# Supplementary material for: Towards the Understanding of the Function of Lanthipeptide and TOMM-Related Genes in Haloferax mediterranei
Source: MDPI journal article supplement (doi:10.3390/biology12020236), 2023-02-02
Supplement: s1 [file s1]

---

## Supplementary Materials

# **Towards the Understanding of the Function of Lanthipeptide and TOMM-Related Genes in *Haloferax mediterranei***

Thales Costa 1,†, Elena Cassin 1,†, Catarina Moreirinha 2,\* , Sónia Mendo 1 and Tânia Sousa Caetano 1,\*

1 CESAM and Department of Biology, University of Aveiro, 3810-193 Aveiro, Portugal

2 CESAM and Department of Chemistry, University of Aveiro, 3810-193 Aveiro, Portugal

\* Correspondence: catarina.fm@ua.pt (C.M.); tcaetano@ua.pt (T.S.C.)

† These authors contributed equally to this work.

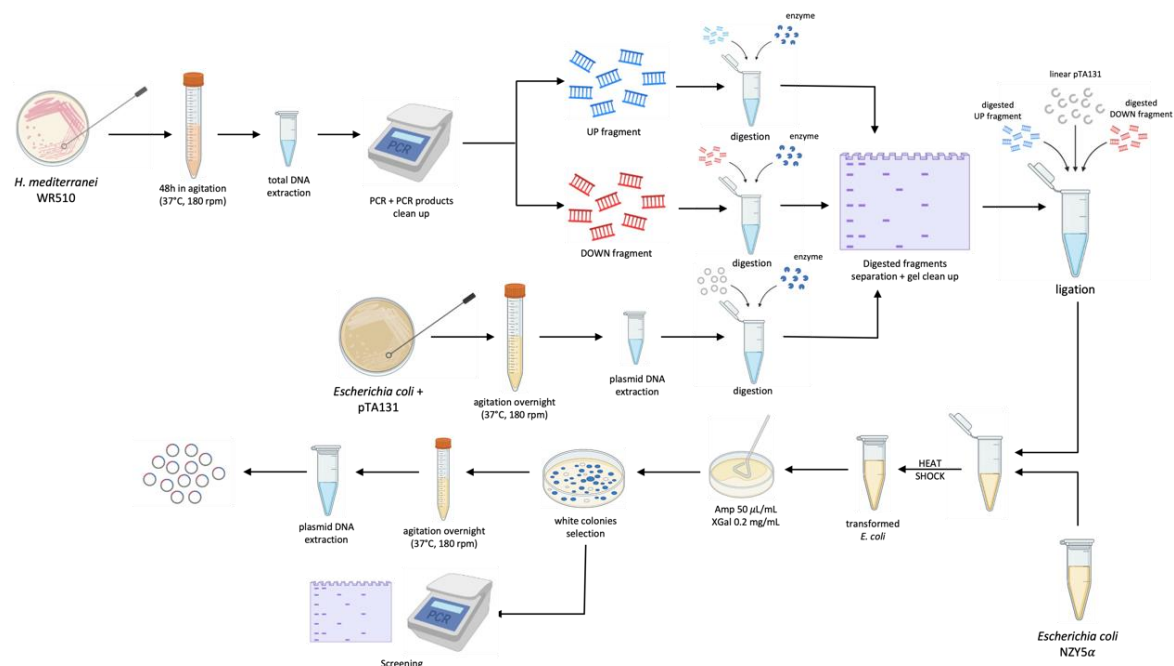

Figure S1: Schematic summary of the construction of recombinant plasmids.

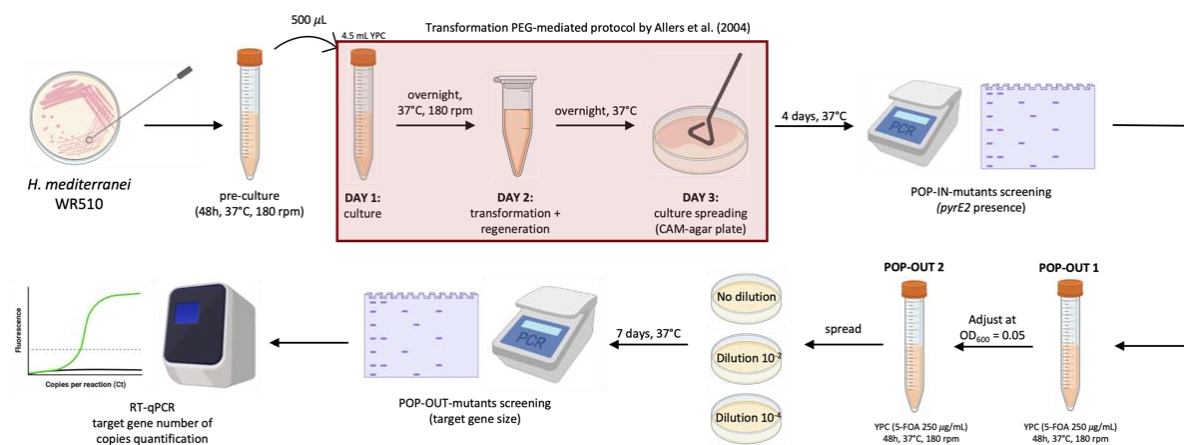

Figure S2: Schematic view of the transformation of *H. mediterranei* WR510 and the selection of knockout mutants.

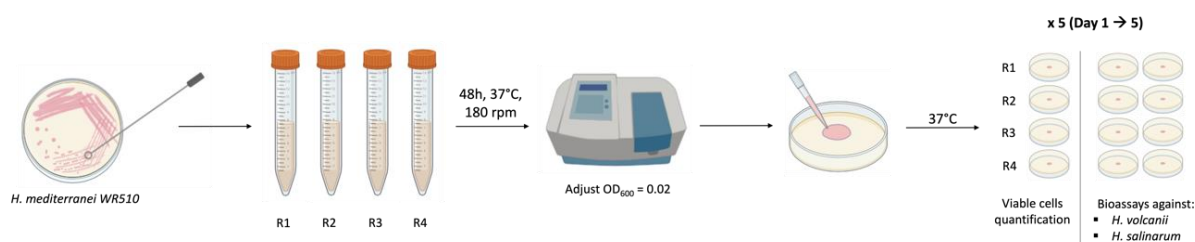

Figure S3: Schematic representation of the assay applied to evaluate *Haloferax mediterranei* WR510 growth and anti-haloarchaea activity.

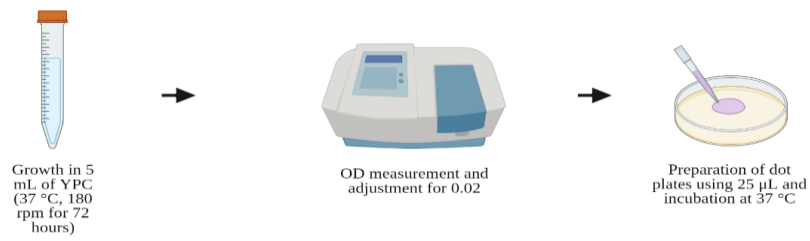

Figure S4: Schematic representation of the general procedure used to prepare *H. mediterranei* dot plates for RNA extraction and FTIR analysis.

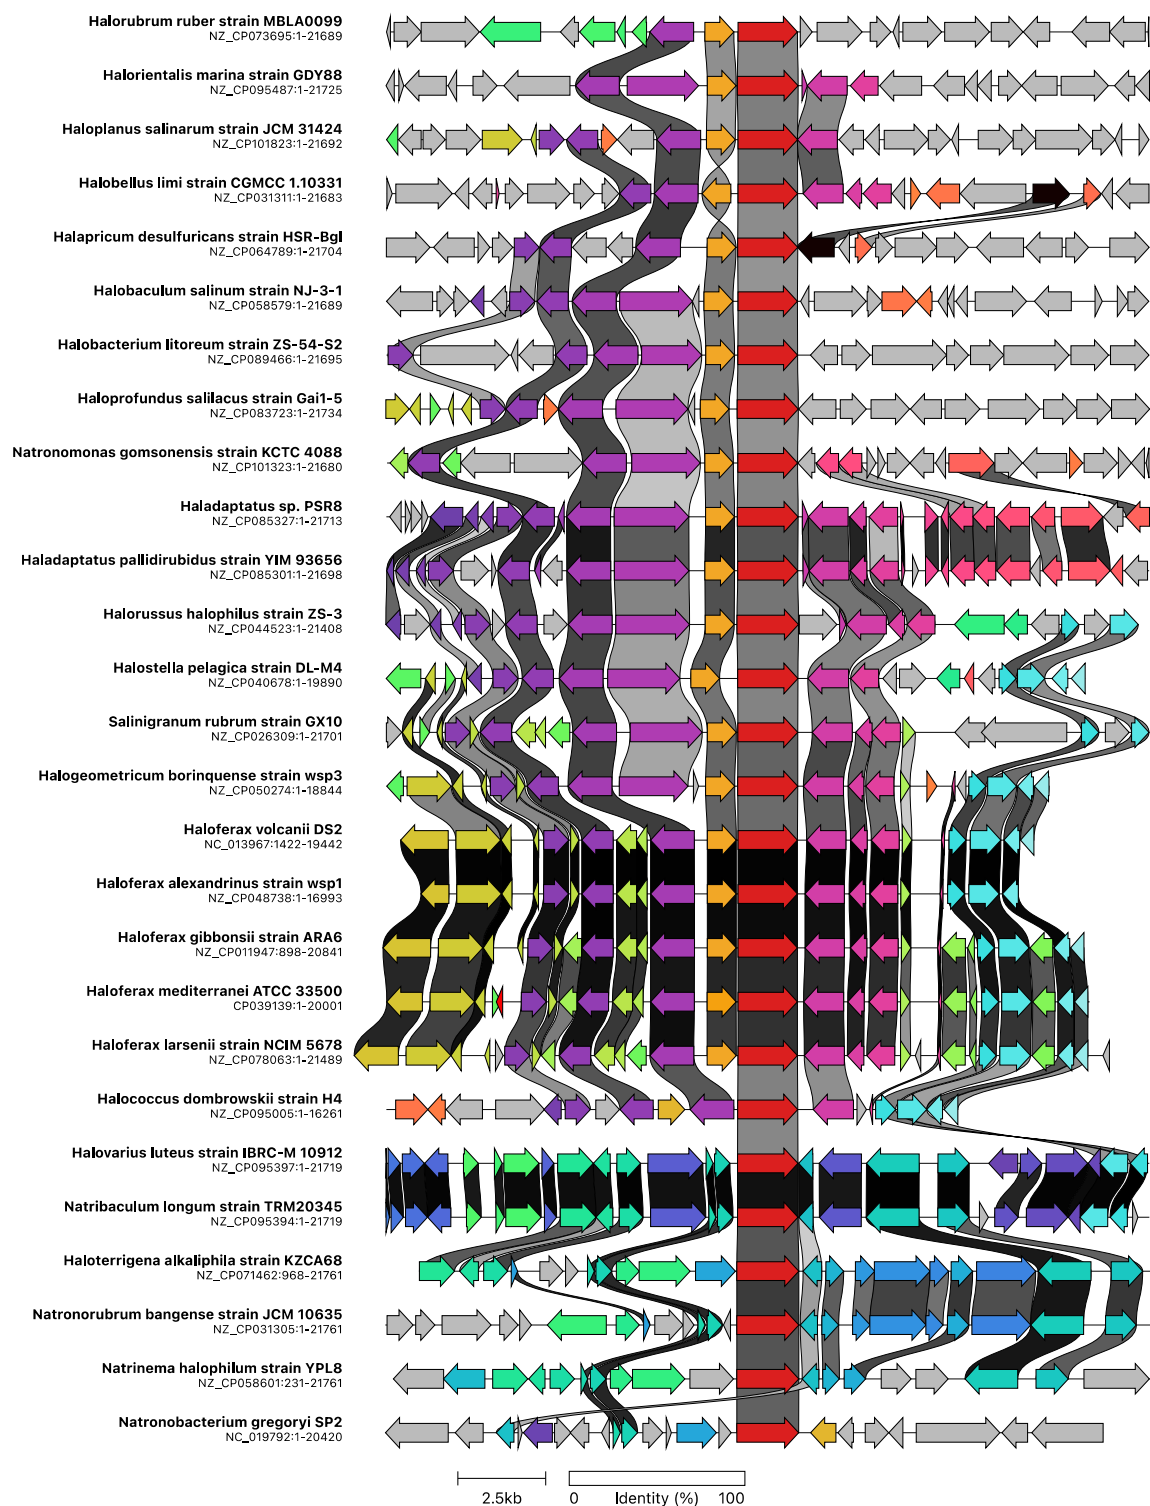

Figure S5: Alignment of the genetic regions containing *ycaO* genes (red ORF) in different haloarchaea.

Table S1: Composition of haloarchaea culture media.

| Solution or Medium                       | Composition (quantities per litre)                                                                                                                             | Notes                                                                                                                                                                                                         |
|------------------------------------------|----------------------------------------------------------------------------------------------------------------------------------------------------------------|---------------------------------------------------------------------------------------------------------------------------------------------------------------------------------------------------------------|
| salt-water 30% (SW 30%)                  | 240g NaCl<br>30g of MgCl <sub>2</sub> •6H <sub>2</sub> O<br>35g MgSO <sub>4</sub> •7H <sub>2</sub> O<br>7g of KCl<br>17.6 mL of a 1M TrisHCl solution (pH 7.5) | After preparation, the solution was auto-claved.                                                                                                                                                              |
| YPC 10X solution                         | 50g of yeast extract (Liofilchem)<br>10 g peptone of meat (Merck)<br>10g of casamino acids (Difco Laboratories)<br>17.6 mL of a 1M KOH solution                | After preparation, the solution was auto-claved.                                                                                                                                                              |
| CAM 10X solution                         | 70g of casamino acids (Difco Laboratories)<br>17.6 mL of a 1M KOH solution                                                                                     | After preparation, the solution was auto-claved.                                                                                                                                                              |
| YPC (yeast-peptone-casamino acids) broth | 98 mL of YPC 10X<br>598 mL of salt-water 30% (SW 30%)<br>298 mL of distilled water (dH <sub>2</sub> O)<br>6mL of 0.5 M CaCl <sub>2</sub>                       | All solutions were prepared and auto-claved separately, and then mixed together in a sterile environment. CaCl <sub>2</sub> solution was filter sterilized with a 0.22µm cellulose acetate filter (Firilabo). |
| YPCss (YPC super salted) broth           | 98 mL of YPC 10X<br>896 mL of salt-water 30% (SW 30%)<br>6mL of 0.5 M CaCl <sub>2</sub>                                                                        | All solutions were prepared and auto-claved separately, and then mixed together in a sterile environment. CaCl <sub>2</sub> solution was filter sterilized with a 0.22µm cellulose acetate filter (Firilabo). |
| CAM (casamino acids) broth               | 98 mL of CAM 10X<br>598 mL of salt-water 30% (SW 30%)<br>298 mL of distilled water (dH <sub>2</sub> O)<br>6mL of 0.5 M CaCl <sub>2</sub>                       | All solutions were prepared and auto-claved separately, and then mixed together in a sterile environment. CaCl <sub>2</sub> solution was filter sterilized with a 0.22µm cellulose acetate filter (Firilabo). |
| YPC-agar/YPCss-agar/CAM-agar (1.5% agar) | YPC broth/YPCss broth/ CAM broth,<br>15g of bacteriological agar (Liofilchem)                                                                                  | The corresponding broth was warmed up and 15g of agar per litre were added.                                                                                                                                   |
| YPC-soft-agar/YPCss-soft-agar (1% agar)  | YPC broth/YPCss broth, 10g of bacteriological agar (Liofilchem)                                                                                                | The corresponding broth was warmed up and 10g of agar per litre were added.                                                                                                                                   |

Table S2: List of primers and respective amplification parameters used for amplification of flanking regions for the construction of knockout plasmids, pTA131 screening of knockout plasmids and pop-in transformants.

| Target           | Primers            |                                    | Restriction enzyme | Annealing Temperature |
|------------------|--------------------|------------------------------------|--------------------|-----------------------|
|                  | Designation        | Sequence (5'→3')                   |                    |                       |
| ycaO up region   | ycaO_UP_FW         | GACTCTA-<br>GAGGTACTCGGTTCGCTCTCAT | XbaI               | 69°C                  |
|                  | ycaO_UP_RV         | TAAGCGGCGCGGTCCCCGCAATATC<br>GCC   | NotI               |                       |
| ycaO down region | ycaO_DOWN_FW       | ATTGCGGCGCGCCAGACGCTGCTCAGACATTC   | NotI               | 69°C                  |
|                  | ycaO_DOWN_RV       | CATGGATCCGGCAACAACCTCATTCC<br>GAA  | BamHI              |                       |
| lacZ MCS         | pUC19_FW           | AGGGTTTTCCAGTCACGAC                | -                  | 54°C                  |
|                  | pUC19_RV           | CTCCGGCTCGTATGTTG                  | -                  |                       |
| ycaO (qPCR)      | check_ycaO_qPCR_Fw | GAGTTGGACGACGCACTCTC               | -                  | 61 °C                 |
|                  | check_ycaO_qPCR_Rv | TGCGACATAGTACGGAAGCG               | -                  |                       |
| medM1 (qPCR)     | qPCR_medM1_fw      | ACGATTATCGATGCGGAGAC               | -                  | 59 °C                 |
|                  | qPCR_medM1_rv      | GGTCATCACGTCTGTGTTGG               | -                  |                       |
| medM2 (qPCR)     | qPCR_medM2_fw      | GAAGCCGTTCGAAACTGAG                | -                  | 58 °C                 |
|                  | qPCR_medM2_rv      | ACGGTGTGTTGGTGTATGGA               | -                  |                       |
| medM3 (qPCR)     | qPCR_medM3_fw      | TTGCATTGCGTATCTGCTTC               | -                  | 59 °C                 |
|                  | qPCR_medM2_rv      | GCTGGTCGTCTTCTCTGGAC               | -                  |                       |
| rpl16 (qPCR)     | qPCR_rpl16s1_F     | CCACGTCATCCGCGAGAACA               | -                  | 57 °C                 |
|                  | qPCR_rpl16s1_R     | CGACCTTCCCGAACGACTGG               | -                  |                       |
